# Supplementary material for: Impact of nitrite on the formation of trichloronitromethane during the UV-LED/chlorine process
Source: Royal Society of Chemistry journal article supplement (doi:10.1039/d1ew00435b), 2021-10-25
Supplement: d1ew00435b1.pdf [file d1ew00435b1.pdf]

## Supplementary Information for:

### Impact of nitrite on the formation of trichloronitromethane during the UV-LED/chlorine process

Jue Wang<sup>a</sup>, Ling Li<sup>a</sup>, Shumin Zhu<sup>a, \*</sup>, Lei Zhu<sup>a</sup>, Lingjun Bu<sup>a</sup>, Da Sheng<sup>a</sup>, Wei Zhang<sup>b, \*</sup>, Shiqing Zhou<sup>a</sup>

*a. Key Laboratory of Building Safety and Energy Efficiency, Ministry of Education, Department of Water Engineering and Science, College of Civil Engineering, Hunan University, Changsha, Hunan 410082, China*

*b. Hunan Provincial Village Drinking Water Quality Safety Engineering Technology Research Center, Hunan City University, Yiyang, Hunan 413000, China*

*\* Corresponding author*

*Email address: [zshuminwater@163.com](mailto:zshuminwater@163.com) (S. Zhu), [hunanweizhang@163.com](mailto:hunanweizhang@163.com) (W. Zhang)*

Text: S1-S3

Tables: S1

Figures: S1

References: 3

Pages Numbers: 8

## **List of supporting information**

**Text S1.** Chemicals.

**Text S2.** Methods of Purge-and-trap and GC-MS to determine THMs and TCNM.

**Text S3.** Methods for calculating theoretical cytotoxicity and genotoxicity of DBPs (THMs and TCNM).

**Table S1.** Chinese hamster ovary cell cytotoxicity and genotoxicity of DBPs identified in this study.

**Figure S1.** Schematic diagram of UV-LED (365 nm) reactors.

**Text S1. Chemicals.**

Bisphenol A, HPLC-grade methanol and formic acid, analytical standard THMs, and trichloronitromethane (TCNM) were obtained from Sigma-Aldrich (MO, USA). Ascorbic acid, sodium thiosulfate ( $\text{NaS}_2\text{O}_3$ ),  $\text{NaH}_2\text{PO}_4$ ,  $\text{Na}_2\text{HPO}_4$ ,  $\text{NaNO}_2$ , sodium hypochlorite ( $\text{NaOCl}$ ) were purchased from Sinopharm (Shanghai, China). All solutions were prepared with ultrapure water ( $18.2 \text{ M}\Omega \text{ cm}$ ) produced by a Milli-Q water purification system (Millipore, Reference).

**Text S2.** Methods of Purge-and-trap and GC-MS to determine THMs and TCNM.

The formed THMs and HANs were detected by purge-and-trap gas chromatography–mass spectrometry (PT-GC-MS). The purge-and-trap sample concentrator (Tekmar Lumin, USA) used as a pretreatment can enrich volatile DBPs, which is then coupled to GC-MS (7890A-5975C, Agilent, USA) analysis. The instrumentation details are as follows: (1) purge and trap analysis: 5 mL of sample was injected into the U-tube chamber and purged at 20 °C for 11 min with helium at 40 mL min<sup>-1</sup>; followed by the desorb mode, the trap was risen to 250 °C for 2 min at the flow rate of 300 mL min<sup>-1</sup>; and finally baked at 280 °C for 2 min to clean up the trap. (2) GC–MS analysis: the initial temperature of the oven began at 30 °C for 9 min, increased to 40 °C at 2 °C min<sup>-1</sup> and maintained for 1 min, and then raised up to 80 °C at 20 °C min<sup>-1</sup>, then raised up to 160 °C at 40 °C min<sup>-1</sup> and maintained for 2 min, and finally reached up to 250 °C at 50 °C and maintained for 1 min; with a split ratio of 10:1.

**Text S3.** Methods for calculating theoretical cytotoxicity and genotoxicity of DBPs (THMs and TCNM).

The cytotoxicity and genotoxicity of formed DBPs was calculated by eqs. S1-2.

$$\text{Cytotoxicity of DBPs} = \frac{\text{Concentration of DBP}}{\text{LC}_{50} \text{ of DBP}} \quad \backslash *$$

$$\text{MERGEFORMAT (S1) Genotoxicity of DBPs} = \frac{\text{Concentration of DBP}}{\text{SCGE Genotoxic Potency of DBP}} \quad \text{(S2)}$$

CHO cells are widely used in toxicology. The LC<sub>50</sub> value is the concentration of each individual DBP inducing a 50% reduction in the density of Chinese Hamster Ovary cells for 72h<sup>1</sup>. The LC<sub>50</sub> values of individual DBPs were available in the literature<sup>2</sup>. This approach has been used to assess toxicity of measured DBPs and evaluate the contribution of individual DBPs to the total DBP-associated toxicity<sup>3</sup>.

**Table S1.** Chinese hamster ovary cell cytotoxicity and genotoxicity of DBPs identified in this study.

| DBPs | LC <sub>50</sub> (M)  | SCGE Genotoxic Potency (M) | Reference |
|------|-----------------------|----------------------------|-----------|
| TCM  | $9.62 \times 10^{-3}$ | $1 \times 10^{-2}$         | 4, 5      |
| TCNM | $5.36 \times 10^{-4}$ | $9.34 \times 10^{-5}$      | 5         |

\*LC<sub>50</sub> and SCGE Genotoxic Potency of DBPs means the concentration of DBP inducing a 50% reduction in the density of Chinese Hamster Ovary cells for 72h.

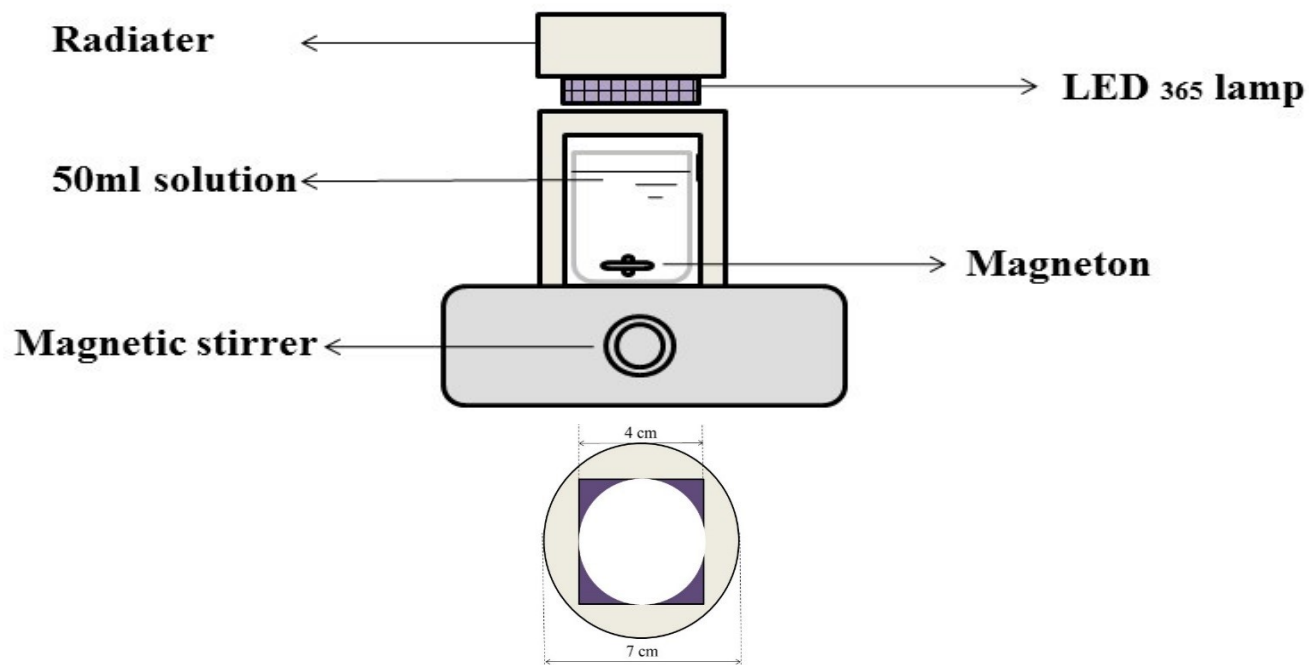

**Figure S1.** Schematic diagram of UV-LED (365 nm) reactors.

## References

- 1 S. D. Yeatts, C. Gennings, E. D. Wagner, J. E. Simmons and M. J. Plewa, Detecting Departure From Additivity Along a Fixed-Ratio Mixture Ray With a Piecewise Model for Dose and Interaction Thresholds, *Journal of Agricultural, Biological and Environmental Statistics*, 2010, **15**, 510-522.
- 2 E. D. Wagner and M. J. Plewa, CHO cell cytotoxicity and genotoxicity analyses of disinfection by-products: An updated review, *Journal of Environmental Sciences*, 2017, **58**, 64-76.
- 3 C. Liu, M. S. Ersan, M. J. Plewa, G. Amy and T. Karanfil, Formation of regulated and unregulated disinfection byproducts during chlorination of algal organic matter extracted from freshwater and marine algae, *Water Res.*, 2018, **142**, 313-324.
- 4 M. Plewa and E. D. Wagner, Drinking water disinfection by-products: Comparative mammalian cell cytotoxicity and genotoxicity, *Encyclopedia of Environmental Health*, 2011, **1**, 806-812.
- 5 M. J. Plewa, E. D. Wagner, P. Jazwierska, S. D. Richardson, P. H. Chen and A. B. McKague, Halonitromethane Drinking Water Disinfection Byproducts: Chemical Characterization and Mammalian Cell Cytotoxicity and Genotoxicity, *Environ. Sci. Technol.*, 2004, **38**, 62-68.
